# Supplementary figures and images for: Taurocholic acid ameliorates hypertension through the activation of TGR5 in the hypothalamic paraventricular nucleus
Source: Royal Society of Chemistry journal article supplement (doi:10.1039/d4fo00808a), 2024-01-01

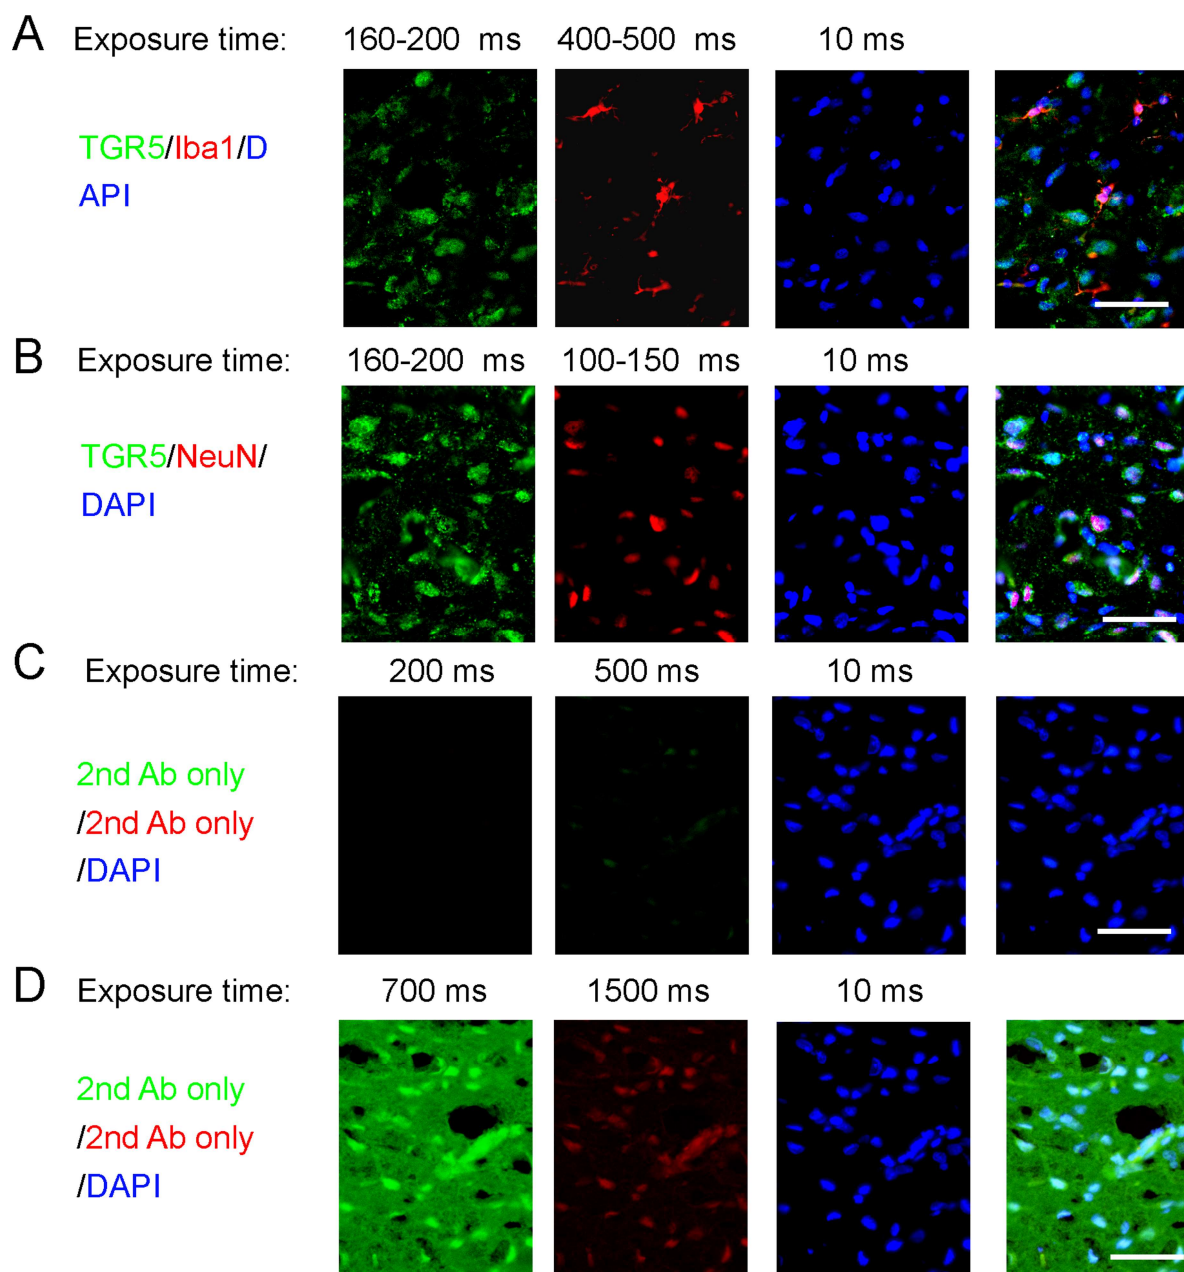

Supplement: d4fo00808a1.pdf [file d4fo00808a1.pdf]
